# Supplementary material for: Effects of Carbamazepine, Lacosamide and Zonisamide on Gliotransmitter Release Associated with Activated Astroglial Hemichannels
Source: MDPI journal article supplement (doi:10.3390/ph13060117), 2020-06-05
Supplement: s1 [file s1]

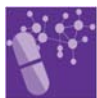

## Supplemental data

### *Effects of subchronic administration of dimethyl sulfoxide and ethanol on Cx43 expression in the plasma membrane fraction of primary cultured astrocytes (Study\_4)*

The subchronic administration (for 7 days, from DIV21 to DIV28) of 0.2% (vol/vol) dimethyl sulfoxide (DMSO) and 1% (vol/vol) ethanol (EOH) did not affect the Cx43 expression in the plasma membrane fraction of primary cultured astrocytes using student T-test.

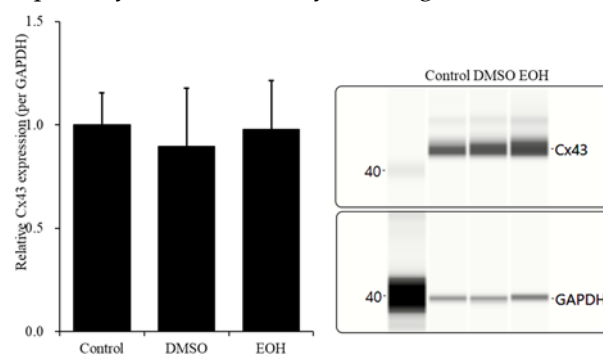

**Figure.** Effects of subchronic administration of dimethyl sulfoxide (DSMO) and ethanol (EOH) on Cx43 expression in the plasma membrane fraction of primary cultured astrocytes and pseudo-gel images using the Simple Western results with anti-Cx43 and anti-GAPDH antibodies for blotting of the plasma membrane fractions. Ordinate: mean  $\pm$  SD ( $n = 6$ ) of the relative protein level of Cx43.
